# Supplementary material for: Identification of a glucose-insensitive variant of Gal2 from Saccharomyces cerevisiae exhibiting a high pentose transport capacity
Source: Springer Nature journal article supplement (doi:10.1038/s41598-021-03822-7), 2021-12-22
Supplement: MOESM1 [file 41598_2021_3822_MOESM1_ESM.pdf]

## Supplementary Information

### Identification of a glucose-insensitive variant of Gal2 from *Saccharomyces cerevisiae* exhibiting a high pentose transport capacity

Sebastian A. Tamayo Rojas, Virginia Schadeweg, Ferdinand Kirchner, Eckhard Boles\* and Mislav Oreb\*

Institute of Molecular Biosciences, Faculty of Biological Sciences, Goethe University Frankfurt, Frankfurt am Main, Germany

\*Corresponding authors

Eckhard Boles

Goethe University Frankfurt

Institute of Molecular Biosciences

Max-von-Laue Straße 9

60438 Frankfurt

Germany

Telephone +49 (0)69 798 29513

Telefax +49 (0)69 798 29527

E-Mail [e.boles@bio.uni-frankfurt.de](mailto:e.boles@bio.uni-frankfurt.de)

Mislav Oreb

Goethe University Frankfurt

Institute of Molecular Biosciences

Max-von-Laue Straße 9

60438 Frankfurt

Germany

Telephone +49 (0)69 798 29331

Telefax +49 (0)69 798 29527

E-Mail [m.oreb@bio.uni-frankfurt.de](mailto:m.oreb@bio.uni-frankfurt.de)

**Supplementary Table S1 | Primers used in this study.**

| <b>Primer name</b> | <b>Application</b>                                                   | <b>Sequence 5'-3'</b>                                                                                                                                    |
|--------------------|----------------------------------------------------------------------|----------------------------------------------------------------------------------------------------------------------------------------------------------|
| Amp_GAL2_F         | Forward primer for GAL2 amplification                                | ATGGCAGTTGAGGAGAAC                                                                                                                                       |
| Amp_GAL2_R         | Reverse primer for GAL2 amplification                                | TTATTCTAGCATGGCCTTG                                                                                                                                      |
| Clon_GAL2_F        | Forward primer for GAL2 cloning                                      | AACACAAAAACAAAAAGTTTTTTAATTTTAATCAAAAAATGGCAG<br>TTGAGGAGAACAA                                                                                           |
| Clon_GAL2_R        | Reverse primer for GAL2 cloning                                      | GAATGTAAGCGTGACATAACTAATTACATGACTCGAGTTATTCTA<br>GCATGGCCTTGATACC                                                                                        |
| SRp001             | Forward primer for cloning GFP, with overhangs for fusing it to Gal2 | GGTACAAGGCCATGCTAGAAATGAGTAAAGGAGAAGAAGACTTTTC<br>AC                                                                                                     |
| SRp002             | Forward primer for cloning GFP, with overhangs for CYC1t             | AACTAATTACATGACTCGAGTTATTTGTATAGTTCATCCATGCCAT<br>G                                                                                                      |
| SRp014             | Reverse primer for cloning GAL2, with overhangs for fusing it to GFP | AGTTCTTCTCCTTTACTCATTCTAGCATGGCCTTGATACC                                                                                                                 |
| VSP66              | Forward primer for mutagenesis of M435 to I in GAL2                  | GGTGCCGGTAACTGTATCATTGTCTTTACCTG                                                                                                                         |
| VSP67              | Reverse primer for mutagenesis of M435 to I in GAL2                  | ACAGGTAAGACAATGATACAGTTACCGGCACC                                                                                                                         |
| VSP31              | Forward primer for mutagenesis of N376 to Y in GAL2                  | GTCATTGGTGTAGTCTACTTTGCCTCCACTTTCTTTAG                                                                                                                   |
| VSP32              | Reverse primer for mutagenesis of N376 to Y in GAL2                  | GAAAGTGGAGGCAAAGTAGACTACCAATGACAATGG                                                                                                                     |
| VSP62              | Forward primer for mutagenesis of M107 to K in GAL2                  | TTGAGAAGGTTTGGTAAGAAACATAAGGATGGTACC                                                                                                                     |
| VSP63              | Reverse primer for mutagenesis of M107 to K in GAL2                  | ACCATCCTTATGTTTCTTACCAAACCTTCTCAAAAAGTCTG                                                                                                                |
| VSP64              | Forward primer for mutagenesis of V239 to L in GAL2                  | AGCTATTCGAACTCACTTCAATGGAGAGTTCCATTAGG                                                                                                                   |
| VSP65              | Reverse primer for mutagenesis of V239 to L in GAL2                  | TGGAActCTCCATTGAAGTGAGTTCGAATAGCTCTTTG                                                                                                                   |
| VSP68              | Forward primer for mutagenesis of L558 to S in GAL2                  | GGTAATAATTACGATTCAGAGGATTTACAACATGACC                                                                                                                    |
| VSP69              | Reverse primer for mutagenesis of L558 to S in GAL2                  | ATGTTGTAATCCTCTGAATCGTAATTATTACCTCTTC                                                                                                                    |
| SRp0171            | Forward primer for deletion of GAL2 with CRISPR Cas9 (gRNA)          | GCCGGTGAGTCAGGGCCTGAGTTTTAGAGCTAGAAATAGCAAGT<br>TAAAATAAGG                                                                                               |
| SRp0172            | Reverse primer for deletion of GAL2 with CRISPR Cas9 (gRNA)          | CTCAGGCCCTGACTCACCGGCGATCATTATCTTTCACTGCGGA<br>G                                                                                                         |
| SRp0157            | Donor DNA for repairing GAL2 locus (forward strand)                  | ATGGCAGTTGAGGAGAACAATATGCCTGTTGTTTCACAGCAACC<br>CCAAGCTGGTGAAGACGTGATCTCTTAGGTAATAATTACGATTTA<br>GAGGATTTACAACATGACGACAAACCGTGGTACAAGGCCATGCT<br>AGAATAA |
| SRp0158            | Donor DNA for repairing GAL2 locus (reverse strand)                  | TTATTCTAGCATGGCCTTGACCACGGTTTGTGTCATGTTGTAA<br>ATCCTCTAAATCGTAATTATTACCTAAGAGATCACGTCTTCACCA<br>GCTTGGGGTTGCTGTGAAACAACAGGCATATTGTTCTCCTCAACT<br>GCCAT   |
| SRp0201            | Forward primer for verification of GAL2 deletion                     | ATGGCAGTTGAGGAGAACAATATG                                                                                                                                 |
| SRp0202            | Reverse primer for verification of GAL2 deletion                     | TTATTCTAGCATGGCCTTGATACCAC                                                                                                                               |

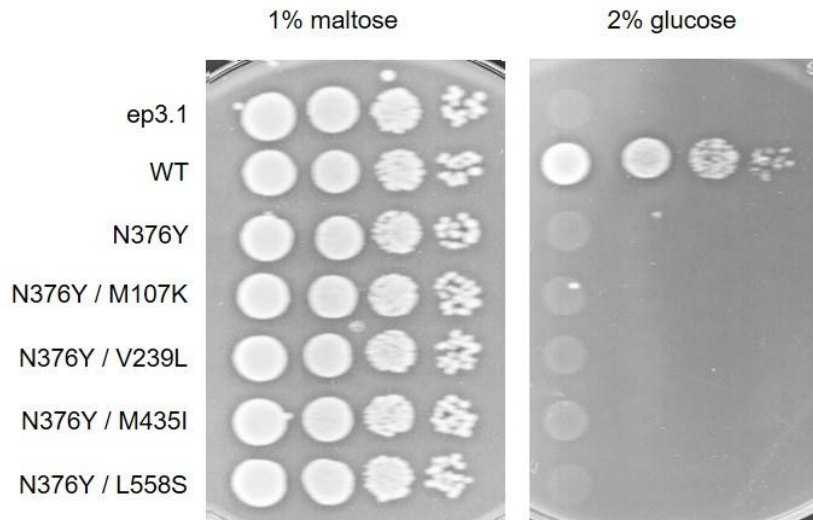

**Supplementary Figure S1 | Effect of the mutations in the Gal2 clone ep3.1 on glucose transport.** The  $hxt^0$  strain EB.Y.VW4000 was transformed with plasmids encoding the ep3.1, wildtype (WT) or indicated variants of Gal2 generated by site directed mutagenesis. Dilution series of cell suspensions were spotted onto agar plates containing the indicated sugars (concentrations are given as % w/v) and the growth was analyzed after three days of incubation at 30°C. Maltose as a permissive carbon source for the  $hxt^0$  strain was used to control the viability of the transformants.

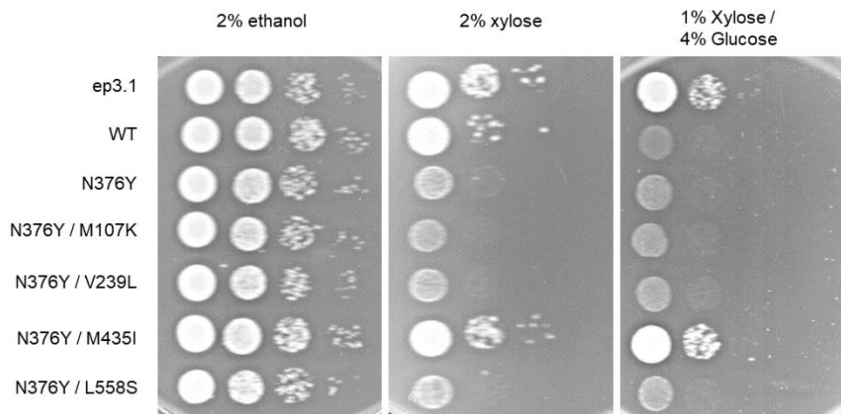

**Supplementary Figure S2 | Effect of the mutations in the Gal2 clone ep3.1 on xylose transport.** The  $hxt^0/hxk^0$  strain AFY10X was transformed with plasmids encoding the ep3.1, wildtype (WT) or indicated variants of Gal2 generated by site directed mutagenesis. Dilution series of cell suspensions were spotted onto agar plates containing the indicated sugars (concentrations are given as % w/v) and the growth was analyzed after five days of incubation at 30°C. Ethanol as a permissive carbon source for the  $hxt^0/hxk^0$  strain was used to control the viability of the transformants.

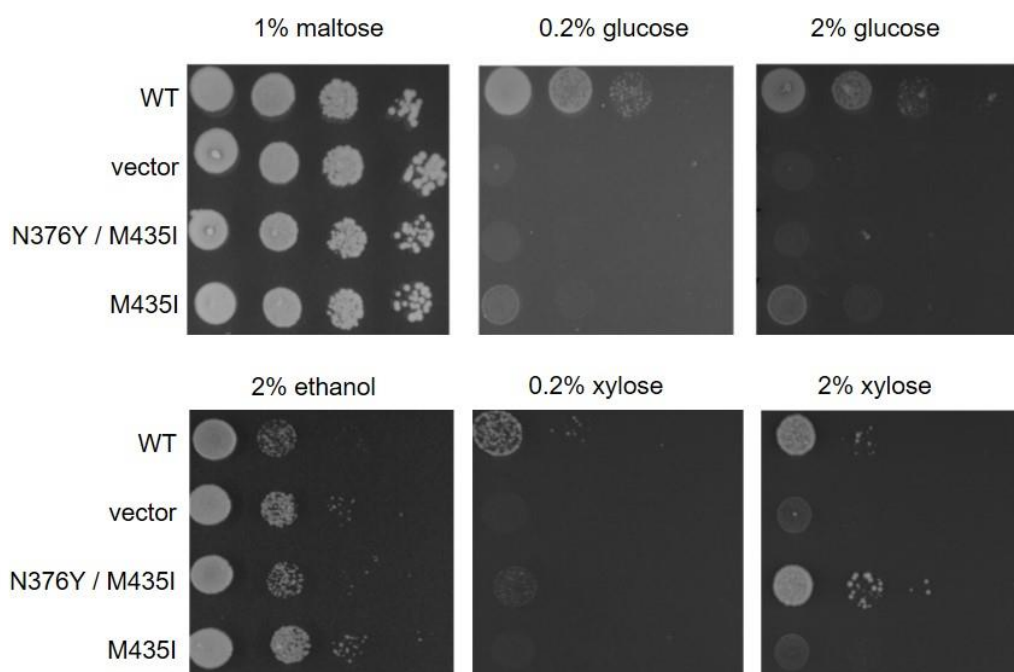

**Supplementary Figure S3 | Effect of the M435I mutation alone on xylose and glucose transport.** The  $hxt^0$  strain EB.Y.VW4000 (top) and the  $hxt^0/hxk^0$  strain AFY10 were transformed with plasmids encoding the indicated variants of Gal2 or the empty vector as a negative control. Dilution series of cell suspensions were spotted onto agar plates containing the indicated sugars (concentrations are given as % w/v) and the growth was analyzed after three ( $hxt^0$  strain) or five ( $hxt^0/hxk^0$  strain) days of incubation at 30°C. Maltose as a permissive carbon source for the  $hxt^0$  strain and ethanol for the  $hxt^0/hxk^0$  strain were used to control the viability of the transformants.

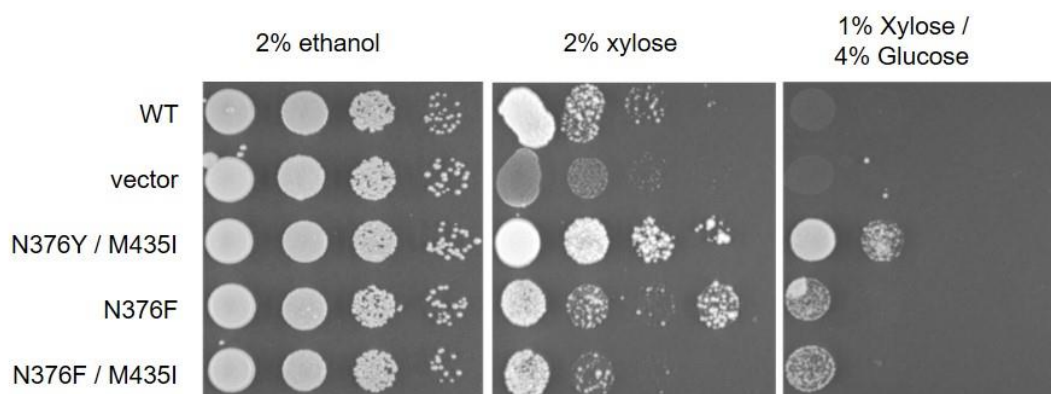

**Supplementary Figure S4 | Combination of the N376F with the M435I mutation.** The  $hxt^0/hxk^0$  strain AFY10 were transformed with plasmids encoding the indicated variants of Gal2 or the empty vector as a negative control. Dilution series of cell suspensions were spotted onto agar plates containing the indicated sugars (concentrations are given as % w/v) and the growth was analyzed after five days of incubation at 30°C. Ethanol as a permissive carbon source for the  $hxt^0/hxk^0$  strain was used to control the viability of the transformants.
